# Supplementary material for: CaSR Antagonist (Calcilytic) NPS 2143 Hinders the Release of Neuroinflammatory IL-6, Soluble ICAM-1, RANTES, and MCP-2 from Aβ-Exposed Human Cortical Astrocytes
Source: Cells. 2020 Jun 2;9(6):1386. doi: 10.3390/cells9061386 (PMC7349863; doi:10.3390/cells9061386)
Supplement: Supplementary file 1 [file cells-09-01386-s001.pdf]

## S1. Supplementary Results and Discussion

### *S1.1. Other proinflammatory agents not affected by antagonizing A $\beta$ •CaSR signaling*

In keeping with previous works from other Laboratories [1-3], our results show that A $\beta$ -exposed NAHAs overproduce and overrelease a set of cytokines and chemokines, i.e. IL-1 $\beta$ , IL-3, IL-8, IL-16, the secretion of which NPS 2143 did not hinder [Table 1; Figure S1]. All these cytokines/chemokines have been linked to inflammatory brain disorders, and their functional roles are still under investigation. Notably, within this group IL-8 shows the highest basal expression in NAHAs-conditioned media as determined by the analysis of the antibody array, whereas IL-1 $\beta$ , IL-3, and IL-16 are nearly undetectable in untreated NAHAs. It is known that upon A $\beta$  and/or IL-1 $\beta$  stimulation, astrocytes release IL-8 [4], a critical mediator for neutrophils-endothelial cells and astrocytes-endothelial cells interactions in CNS inflammatory reactions [5].

IL-1 $\beta$  is a relevant cofactor in AD development risk [6,7], AD neuroinflammation [8-10], and acts as a co-promoter of ICAM-1/sICAM-1 [11-16] and of RANTES [17,18] expression in NAHAs.

In experimental co-culture models, IL-3 released from astrocytes supports the growth of microglia cells, inducing them to remove A $\beta$  fibrils, and exerting in such way a neuroprotective role [19].

IL-16 is a chemokine inducing migration across the BBB and proliferation of CD4<sup>+</sup> immune cells and promoting the expression of other proinflammatory cytokines including IL-1 $\beta$  and IL-6. In traumatic CNS injury astrocytes, microglia, and also neurons release this cytokine. IL-16 levels are found to be increased in AD patients as an expression of immune activation in response to the presence of A $\beta$  deposits [20].

Moreover, the constitutive secretion of two other agents also involved in neuroinflammation, i.e. chemokine MCP-1 and metalloproteinase inhibitor TIMP-2, was unaffected in cultured A $\beta$   $\pm$  NPS 2143-treated NAHAs [Table 1; Figure S1]. Hence, it is feasible that A $\beta$ -treated microglia might be the main source of MCP-1 surpluses in AD brains [9]. TIMP-2 is amply expressed in adult CNS and its level is increased in CSF of AD patients, as regulator of metalloproteinases activity plays an anti-inflammatory and neuroprotective role [21].

In addition, our results show, rather unexpectedly, that 96-h after the experiments onset, a delayed stimulation of PDGF-BB secretion over both control and fA $\beta$  alone-exposed astrocytes took place in NAHAs co-treated with fA $\beta$ +NPS 2143 [Table 1, Supp Fig. 2]. PDGF-BB is thought to be an important angiogenic promoter in the tissue replacement phase after CNS injury and a neuroprotective agent, especially in cognitive dysfunction [22].

Clearly, more studies are needed to unravel the detailed mechanisms regulating the expression of these agents in NAHAs and to clarify their roles in human AD's neuroinflammation.

## Other cytokines and chemokines arrays

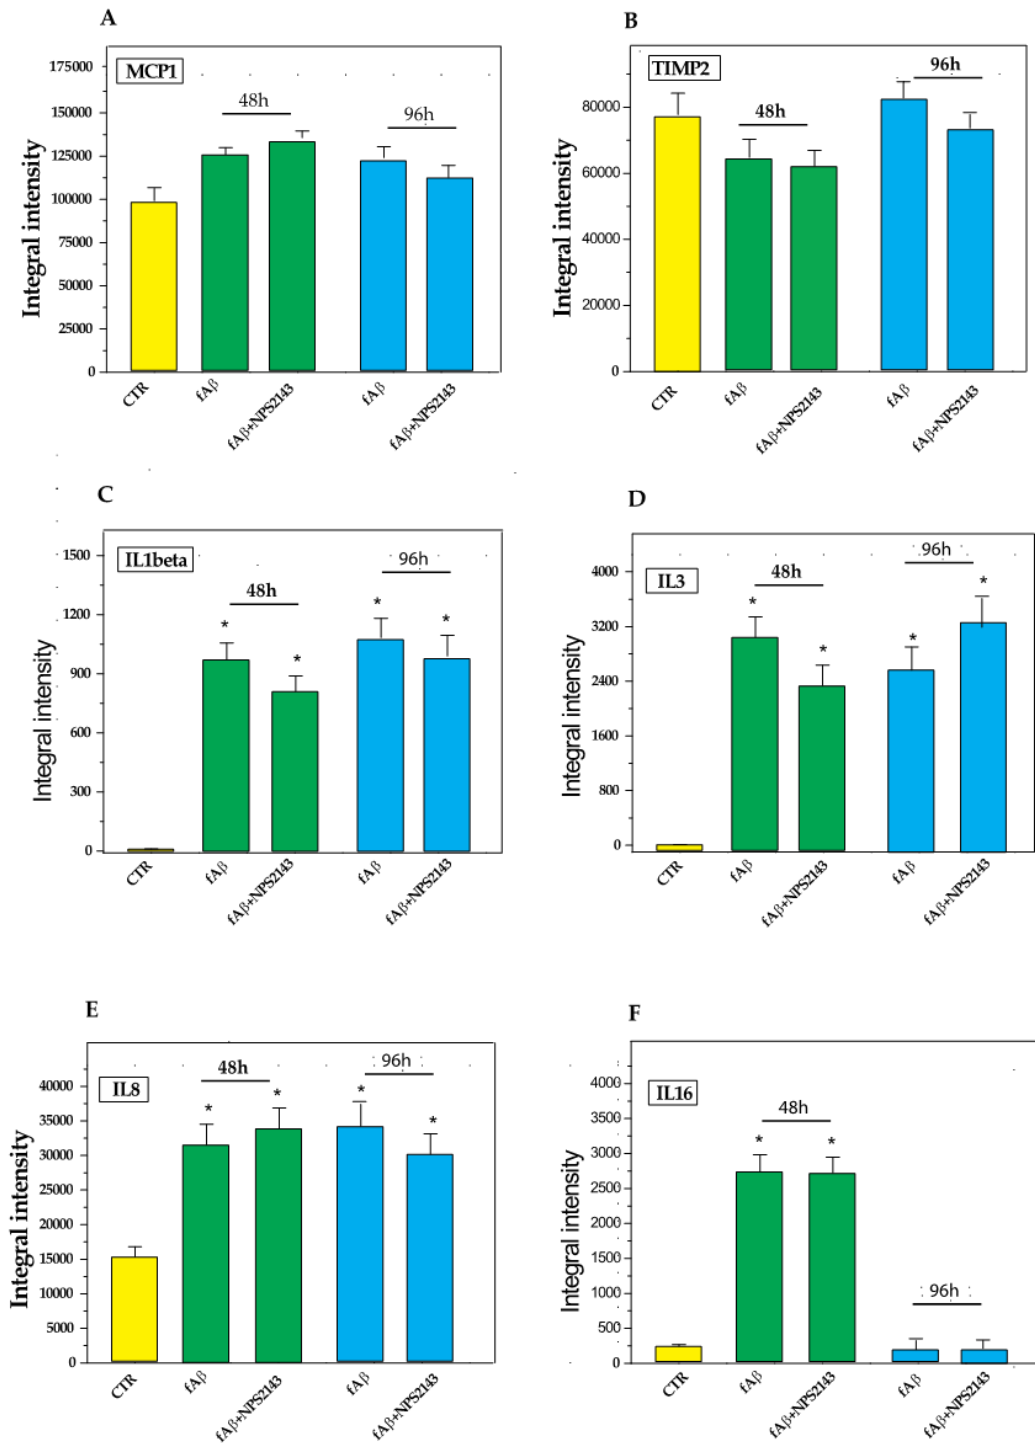

Figure S1.

**Figure S1.** Time-dependent expression of cytokines and chemokines (A–F) secreted by control and fAβ-treated NAHAs, the levels of which were unaffected by a co-treatment of fAβ with CaSR NAM NPS 2143. Each cytokine/chemokine was detected in the NAHA-conditioned media via membrane-based antibody array. The antibody array was analyzed with an Odyssey™ (LI-COR) scanner and the positive staining intensities were quantified using the Image Studio™ (v.5.2) software. The integral intensities of the positive signals from each array were normalized via comparisons to corresponding positive controls. Results were expressed as mean values ± SEM. *P* values were calculated via one-way ANOVA followed by post hoc Tukey's test. \* *P* < 0.05 vs. controls (CTR). fAβ, fAβ<sub>25–35</sub>.

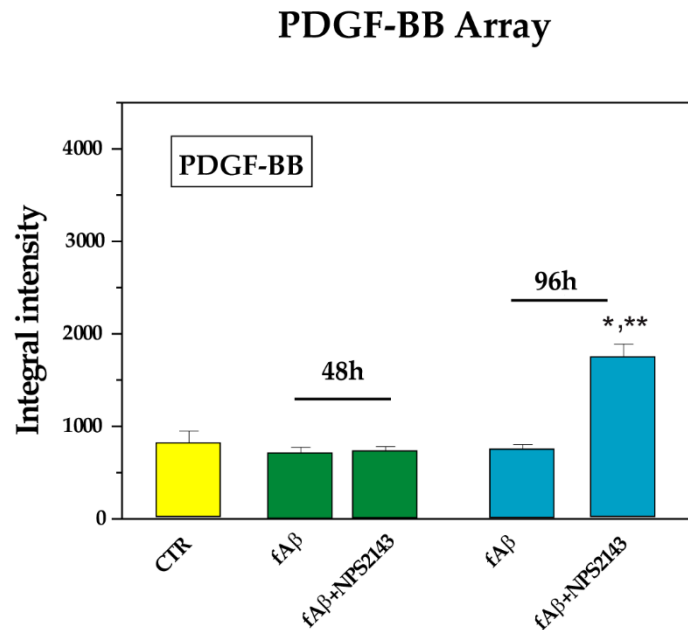

**Figure S2**

**Figure S2.** The secreted PDGF-BB levels pattern behaves differently from the all the other cytokines and chemokines we tested in the NAHA-conditioned media via membrane-based antibody array, because its basal levels did not change with respect to controls in fAβ-treated NAHAs for up to 96 h, but did increase at 96 h in fAβ+NPS 2143 co-treated NAHAs. The antibody array was analyzed with an Odyssey™ (LI-COR) scanner and the positive staining intensities of PDGF-BB were quantified using the Image Studio™ (v.5.2) software. fAβ, fAβ<sub>25-35</sub>. The integral intensities of the positive signals from each array were normalized via comparisons to corresponding positive controls. Results were expressed as mean values ± SEM. *P* values were calculated via one-way ANOVA followed by post hoc Tukey's test. \* *P* < 0.05 vs. controls (CTR); \*\* *P* < 0.05 vs. fAβ. fAβ, fAβ<sub>25-35</sub>.

## S2. References:

1. Labzin, L.I.; Heneka, M.T.; Latz, E. Innate immunity and neurodegeneration. *Annu. Rev. Med.* **2018**, *69*, 437–449.
2. Becher, B.; Spath, S.; Goverman, J. Cytokine networks in neuroinflammation. *Nat. Rev. Immunol.* **2017**, *17*, 49–59.
3. Medeiros, R.; LaFerla, F.M. Astrocytes: conductors of the Alzheimer disease neuroinflammatory symphony. *Exp Neurol.* **2013**, *239*, 133–138.
4. Ashutosh; Kou, W.; Cotter, R.; Borgmann, K.; Wu, L.; Persidsky, R.; Sakhuja, N.; Ghorpade, A. CXCL8 protects human neurons from amyloid-beta-induced neurotoxicity: relevance to Alzheimer's disease. *Biochem. Biophys. Res. Commun.* **2011**, *412*, 565–571.
5. Liu, C.; Cui, G.; Zhu, M.; Kang, X.; Guo, H. Neuroinflammation in Alzheimer's disease: chemokines produced by astrocytes and chemokine receptors. *Int. J. Clin. Exp. Pathol.* **2014**, *7*, 8342–8355.
6. Croitoru-Lamoury, J.; Guillemin, G.J.; Boussin, F.D.; Mognetti, B.; Gigout, L.I.; Chéret, A.; Vaslin, B.; Le Grand, R.; Brew, B.J.; Dormont, D. Expression of chemokines and their receptors in human and simian astrocytes: evidence for a central role of TNF alpha and IFN gamma in CXCR4 and CCR5 modulation. *Glia.* **2003**, *41*, 354–370.
7. Chakrabarty, P.; Jansen-West, K.; Beccard, A.; Ceballos-Diaz, C.; Levites, Y.; Verbeeck, C.; Zubair, A.C.; Dickson, D.; Golde, T.E.; Das, P. Massive gliosis induced by interleukin-6 suppresses Aβeta deposition in vivo: evidence against inflammation as a driving force for amyloid deposition. *FASEB J.* **2010**, *24*, 548–559.
8. Ambrosini, E.; Remoli, M.E.; Giacomini, E.; Rosicarelli, B.; Serafini, B.; Lande, R.; Aloisi, F.; Coccia, E.M. Astrocytes produce dendritic cell-attracting chemokines in vitro and in multiple sclerosis lesions. *J. Neuropathol. Exp. Neurol.* **2005**, *64*, 706–715.

9. Sokolova, A.; Hill, M.D.; Rahimi, F.; Warden, L.A.; Halliday, G.M.; Shepherd, C.E. Monocyte chemoattractant protein-1 plays a dominant role in the chronic inflammation observed in Alzheimer's disease. *Brain Pathol.* **2009**, *19*, 392–398.
10. Wang, W.Y.; Tan, M.S.; Yu, J.T.; Tan, L. Role of pro-inflammatory cytokines released from microglia in Alzheimer's disease. *Ann. Transl. Med.* **2015**, *3*, 136.
11. Lee, S.J.; Benveniste, E. N. Adhesion molecule expression and regulation on cells of the central nervous system. *J. Neuroimmunol.* **1999**, *98*, 77–88.
12. Schmal, H.; Czermak, B.J.; Lentsch, A.B.; Bless, N.M.; Beck-Schimmer, B.; Friedl, H.P.; Ward, P.A. Soluble ICAM-1 activates lung macrophages and enhances lung injury. *J. Immunol.* **1998**, *161*, 3685–3693.
13. Ramos, T.N.; Bullard, D.C.; Barnum, S.R. ICAM-1: isoforms and phenotypes. *J. Immunol.* **2014**, *192*, 4469–4474.
14. Müller, N. The Role of Intercellular Adhesion Molecule-1 in the Pathogenesis of Psychiatric Disorders. *Front. Pharmacol.* **2019**, *10*, 1251.
15. Lawson, C.; Wolf, S. ICAM-1 signaling in endothelial cells. *Pharmacol. Rep.* **2009**, *61*, 22–32.
16. Wennstrom, M.; Nielsen, H. M.; Orhan, F.; Londos, E.; Minthon, L.; Erhardt, S. Kynurenic Acid levels in cerebrospinal fluid from patients with Alzheimer's disease or dementia with Lewy bodies. *Int. J. Tryptophan Res.* **2014**, *7*, 1–7.
17. Lin, M.S.; Hung, K.S.; Chiu, W.T.; Sun, Y.Y.; Tsai, S.H.; Lin, J.W.; Lee, Y.H. Curcumin enhances neuronal survival in N-methyl-d-aspartic acid toxicity by inducing RANTES expression in astrocytes via PI-3K and MAPK signaling pathways. *Prog. Neuropsychopharmacol. Biol. Psychiatry.* **2011**, *35*, 931–938.
18. Rivieccio, M.A.; John, G.R.; Song, X.; Suh, H.S.; Zhao, Y.; Lee, S.C.; Brosnan, C.F. The cytokine IL-1 $\beta$  activates IFN response factor 3 in human fetal astrocytes in culture. *J. Immunol.* **2005**, *174*, 3719–3726.
19. Zambrano, A.; Otth, C.; Mujica, L.; Concha, I.I.; Maccioni, R.B. Interleukin-3 prevents neuronal death induced by amyloid peptide. *BMC Neurosci.* **2007**, *8*, 82.
20. Di Rosa, M.; Dell'Ombra, N.; Zambito, A.M.; Malaguarnera, M.; Nicoletti, F.; Malaguarnera, L. Chitotriosidase and inflammatory mediator levels in Alzheimer's disease and cerebrovascular dementia. *Eur. J. Neurosci.* **2006**, *23*, 2648–2656.
21. Lee, E.; Kim, H. The anti-inflammatory role of tissue inhibitor of metalloproteinase-2 in lipopolysaccharide-stimulated microglia. *J. Neuroinflammation* **2014**, *11*, 116.
22. Zhou, Z.; Wu, Q.; Lu, Y.; Zhang, X.; Lv, S.; Shao, J.; Zhou, Y.; Chen, J.; Hou, L.; Huang, C.; Zhang, X. Crosstalk between soluble PDGF-BB and PDGFR  $\beta$  promotes astrocytic activation and synaptic recovery in the hippocampus after subarachnoid hemorrhage. *FASEB J.* **2019**, *33*, 9588–9601.
